# Supplementary material
Source: publisher site journal article supplement (https://www.spandidos-publications.com/2280/downloadSupplementary)
Supplement: Supplementary file 1 [file downloadSupplementary]

## Sheet: Sheet1
Table SVI. MicroRNA enrichment degree from the primary Sjögren syndrome activation group.
hsa-miR-15a-5p	down	158
hsa-miR-181a-5p	down	112
hsa-miR-5787	up	106
hsa-miR-98-5p	up	98
hsa-miR-6791-5p	up	90
hsa-miR-181c-5p	down	81
hsa-miR-4505	up	73
hsa-miR-22-3p	down	69
hsa-miR-140-3p	down	63
hsa-miR-3609	down	63
hsa-miR-30e-5p	down	61
hsa-miR-148b-3p	down	59
hsa-miR-101-3p	down	58
hsa-miR-7150	up	55
hsa-miR-148a-3p	down	52
hsa-miR-6779-5p	up	48
hsa-miR-30c-1-3p	up	41
hsa-miR-4492	up	41
hsa-miR-30d-5p	down	39
hsa-miR-5096	up	37
hsa-miR-550a-5p	down	37
hsa-miR-3620-5p	up	34
hsa-miR-31-5p	down	31
hsa-miR-194-5p	down	28
hsa-miR-423-5p	down	28
hsa-miR-155-5p	up	26
hsa-miR-1273g-3p	up	25
hsa-miR-4472	up	20
hsa-miR-1275	up	19
hsa-miR-6803-5p	up	19
hsa-miR-4447	up	18
hsa-miR-361-5p	down	17
hsa-miR-4687-3p	up	16
hsa-miR-3607-5p	down	12
hsa-miR-6073	up	12
hsa-miR-1246	up	9
hsa-miR-425-5p	down	9
hsa-miR-6126	up	9
hsa-miR-4301	up	8
hsa-miR-7641	up	7
hsa-miR-4484	up	6
hsa-miR-4734	down	4
hsa-miR-4508	up	2
hsa-miR-4638-5p	up	1
